# Supplementary material
Source: Elsevier journal article supplement (http://eprints.esc.cam.ac.uk/3011/13.haslightboxThumbnailVersion/mmc2.pdf)

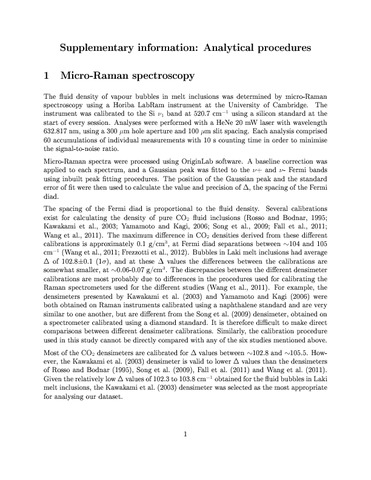

Supplement: mmc2 [file mmc2.pdf]
